# Supplementary material
Source: Royal Society of Chemistry journal article supplement (doi:10.1039/d6im00032k)
Supplement: d6im00032k1.pdf [file d6im00032k1.pdf]

## Supporting Information

### **K(Gd<sub>0.1</sub>Yb<sub>0.9</sub>)<sub>3</sub>F<sub>10</sub>, A Promising Refrigerant for sub-100 mK Adiabatic Demagnetization Refrigeration**

*Qiao-Fei Xu,<sup>ab,#</sup> Peng Zhao,<sup>c,#</sup> Man-Ting Chen,<sup>a</sup> Ruo-Tong Wu,<sup>a</sup> Wei Dai,<sup>c,\*</sup> La-Sheng Long,<sup>a,\*</sup> and Lan-Sun Zheng<sup>a</sup>*

*<sup>a</sup> Collaborative Innovation Center of Chemistry for Energy Materials, State Key Laboratory of Physical Chemistry of Solid Surfaces, College of Chemistry and Chemical Engineering, Xiamen University, Xiamen 361005, China*

*E-mail: [lslong@xmu.edu.cn](mailto:lslong@xmu.edu.cn)*

*<sup>b</sup> Key Laboratory of Functional Molecular Solids Ministry of Education, College of Chemistry and Materials Science, Anhui Normal University, Wuhu, 241002, Anhui, China.*

*<sup>c</sup> State Key Laboratory of Cryogenic Science and Technology, Technical Institute of Physics and Chemistry, Chinese Academy of Sciences, Beijing 100190, China*

*E-mail: [cryodw@mail.ipc.ac.cn](mailto:cryodw@mail.ipc.ac.cn)*

*Q.-F. Xu and P. Zhao contributed equally to this work.*

**Measurement and methods:** All materials including  $\text{Gd}_2(\text{SO}_4)_3 \cdot 8\text{H}_2\text{O}$ , reagents, and solvents were commercially sourced and used without further purification. Powder X-ray diffraction (XRD) data were collected using a Rigaku Ultima IV X-ray diffractometer with  $\text{Cu K}\alpha$  radiation. The proportion of Gd and Yb in **1** were evaluated using an Agilent 7800 ICP-MS, with results reported as the average of three measurements. Elemental mapping of **1** was performed with a ZEISS Sigma scanning electron microscope. Magnetic susceptibility was measured with a Quantum Design superconducting quantum interference device (SQUID). Heat capacity was investigated using a Quantum Design physical property measurement system.

**X-ray Crystallography:** Data of **1** was collected using an XtaLAB Synergy four-circle diffractometer with monochromatic  $\text{Mo K}\alpha$  radiation. Data reduction and absorption correction were applied by using the multi-scan program. The structures were determined and refined using full-matrix least-squares based on  $F^2$  with SHELXS and SHELXL-2018<sup>1</sup> within Olex2.<sup>2</sup> Crystal data and refinement details are presented in Table S1. The data can be obtained free of charge from the FIZ Karlsruhe (CSD 2523489).

**The two-stage refrigerator:** Fig. 3a illustrates the two-stage ADR used in this study, which consists of a 2<sup>nd</sup> cold plate (heat sink), two magnets capable of providing a maximum magnetic field of 4 T, a GGG salt pill, a **1** salt pill, and two heat switches. The two salt pills are each installed within their respective magnets. The **1** salt pill is connected to the GGG salt pill via HS2, while the GGG salt pill is connected to the 2<sup>nd</sup> cold plate via HS1. Thermometers are mounted on both salt pills, and a resistive heater is attached to the **1** salt pill to apply a heat load. The cooling process operates as follows: First, with HS1 turned off and HS2 turned on, the GGG salt pill is demagnetized to pre-cool the **1** salt pill. After the pre-cooling is completed, HS2 is turned off, and then the **1** salt pill is demagnetized.

The two heat switches used in the experiment are active gas-gap heat switches, with their structure shown in Fig. S5. Each heat switch consists of an adsorption bed containing adsorbent material (activated carbon) and a main body. The main body is composed of two heat transfer copper fins that are not in direct contact and form a gas-gap space, along with a stainless steel sealing shell. The interior of the heat switch is filled with a certain amount of <sup>3</sup>He gas, typically

on the order of  $10^{-4}$  g, with a cost of a few dollars. At low temperatures, the  $^3\text{He}$  gas is adsorbed by the adsorbent material, leaving the gas gap in a high-vacuum state, and the heat switch is in the off state. When heat is applied to the adsorption bed, the  $^3\text{He}$  gas adsorbed in the adsorbent material desorbs and enters the gas gap, transitioning the heat switch to the on state.

**Table S1** Crystal data for **1**

| Compound                  | <b>1</b>                                                  |
|---------------------------|-----------------------------------------------------------|
| Formula                   | $\text{K}(\text{Gd}_{0.1}\text{Yb}_{0.9})_3\text{F}_{10}$ |
| Formula weight            | 743.48                                                    |
| Temperature/K             | 100                                                       |
| Crystal system            | Cubic                                                     |
| Space group               | $Fm\bar{3}m$                                              |
| $a/\text{\AA}$            | 11.4254(3)                                                |
| $V/\text{\AA}^3$          | 1491.47(10)                                               |
| $Z$                       | 8                                                         |
| $D_c/\text{g cm}^{-3}$    | 6.622                                                     |
| $\mu/\text{mm}^{-1}$      | 36.917                                                    |
| $2\theta^\circ$           | 7.132-58.006                                              |
| Independent reflections   | 126                                                       |
| $F(000)$                  | 2538                                                      |
| GOOF                      | 1.202                                                     |
| $R_1[I > 2\sigma(I)]^a$   | 0.0133                                                    |
| $wR_2(\text{All data})^b$ | 0.0493                                                    |

$$^a R_1 = \sum ||F_o| - |F_c|| / \sum |F_o| \quad ^b wR_2 = \{ \sum [w(F_o^2 - F_c^2)^2] / \sum [w(F_o^2)^2] \}^{1/2}$$

**Table S2. ICP results in **1**,  $\text{K}(\text{Lu}_{0.9}\text{Gd}_{0.1})_3\text{F}_{10}$  and  $\text{K}(\text{Yb}_{0.9}\text{Y}_{0.1})_3\text{F}_{10}$ .**

|                                                                             | Experimental value | Calculated value |
|-----------------------------------------------------------------------------|--------------------|------------------|
|                                                                             | <b>Yb : Gd</b>     |                  |
| <b>1</b>                                                                    | <b>9.02 ± 0.05</b> | <b>9.0</b>       |
|                                                                             | <b>Lu : Gd</b>     |                  |
| <b><math>\text{K}(\text{Lu}_{0.9}\text{Gd}_{0.1})_3\text{F}_{10}</math></b> | <b>8.98 ± 0.06</b> | <b>9.0</b>       |
|                                                                             | <b>Yb : Y</b>      |                  |
| <b><math>\text{K}(\text{Yb}_{0.9}\text{Y}_{0.1})_3\text{F}_{10}</math></b>  | <b>9.05 ± 0.09</b> | <b>9.0</b>       |

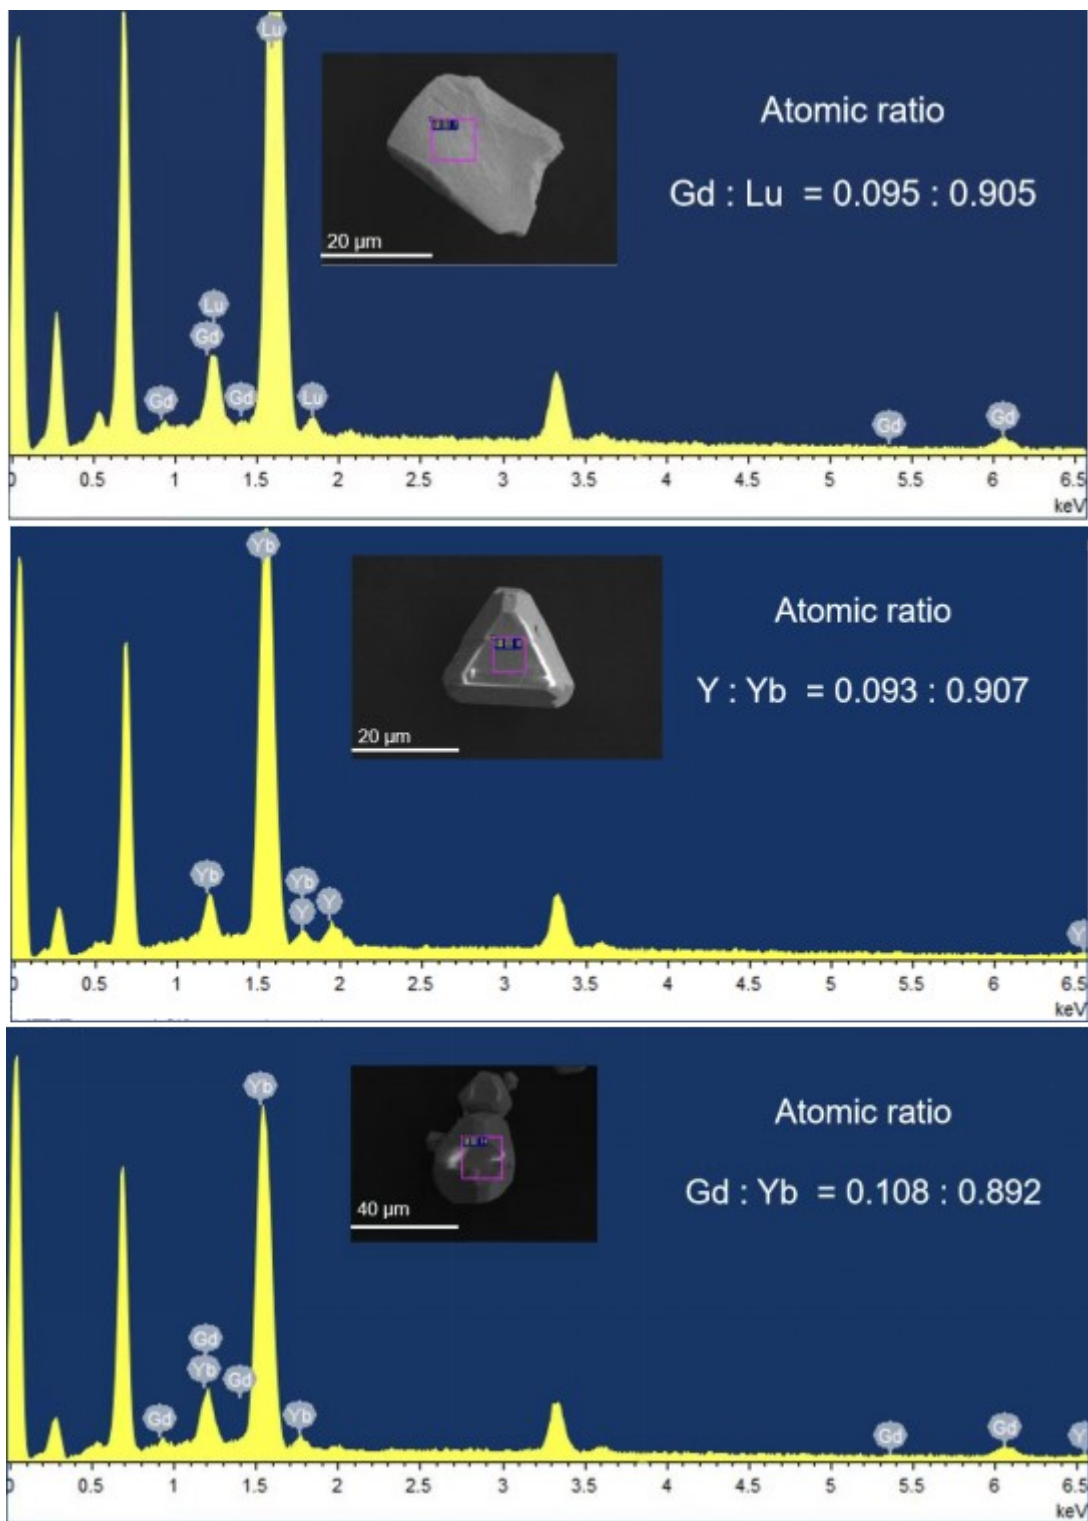

**Fig. S1.** Energy-dispersive X-ray spectroscopy of  $\text{K}(\text{Lu}_{0.9}\text{Gd}_{0.1})_3\text{F}_{10}$  and  $\text{K}(\text{Yb}_{0.9}\text{Y}_{0.1})_3\text{F}_{10}$  and **1**.

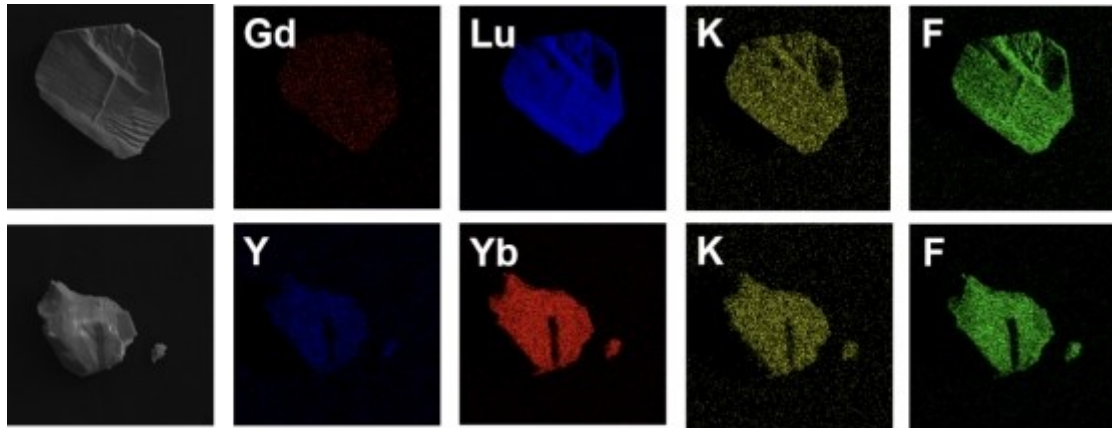

Fig. S2. EDS elemental maps of  $\text{K}(\text{Lu}_{0.9}\text{Gd}_{0.1})_3\text{F}_{10}$  and  $\text{K}(\text{Yb}_{0.9}\text{Y}_{0.1})_3\text{F}_{10}$ .

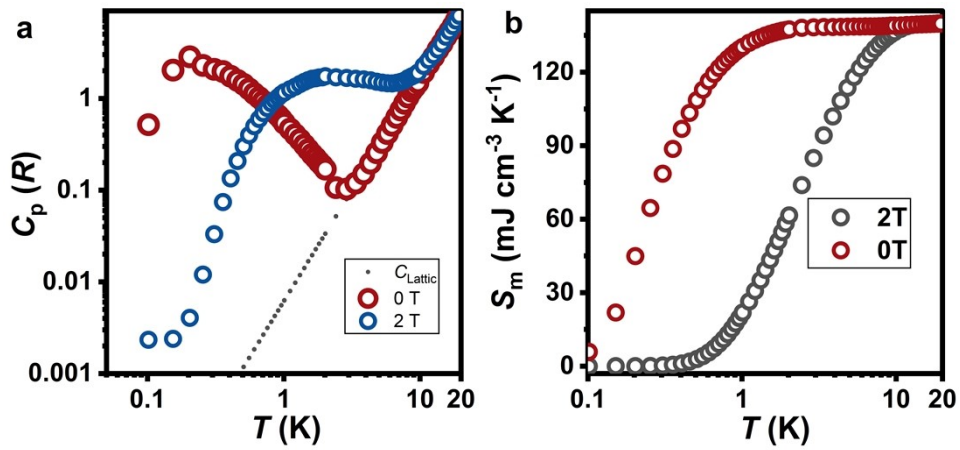

Fig. S3 (a) Experimental heat capacity ( $C_p$ ) normalized to the gas constant ( $R$ ) of  $\text{Gd}_2(\text{SO}_4)_3 \cdot 8\text{H}_2\text{O}$ ; (b) The experimental magnetic entropy  $S_m$  in  $\text{Gd}_2(\text{SO}_4)_3 \cdot 8\text{H}_2\text{O}$  under various applied fields.

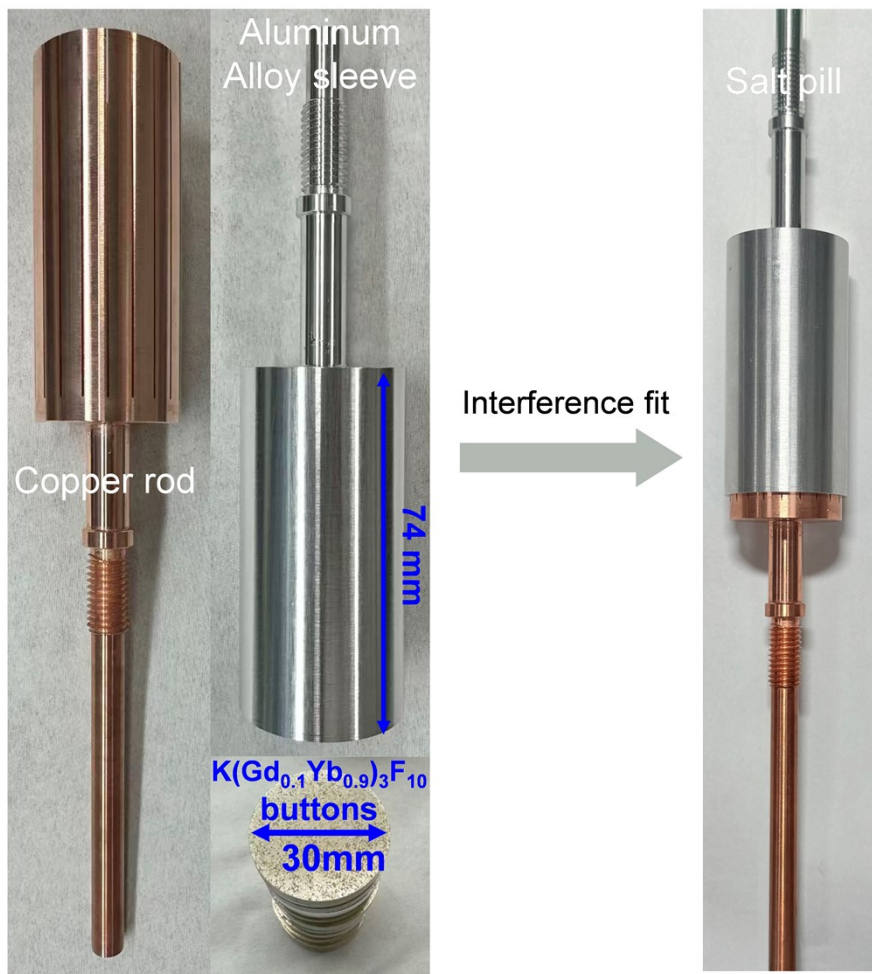

Fig. S4. Salt pill photos

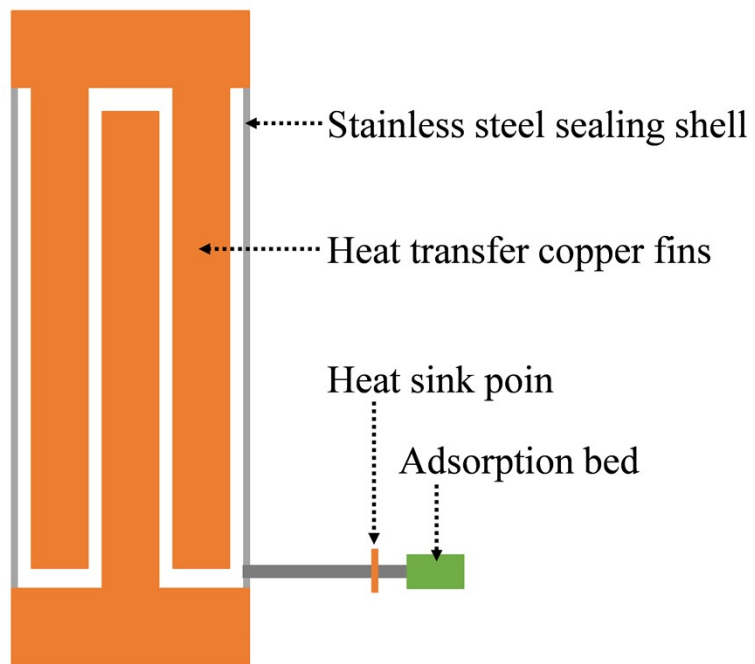

Fig. S5 Schematic diagram of thermal switch structure

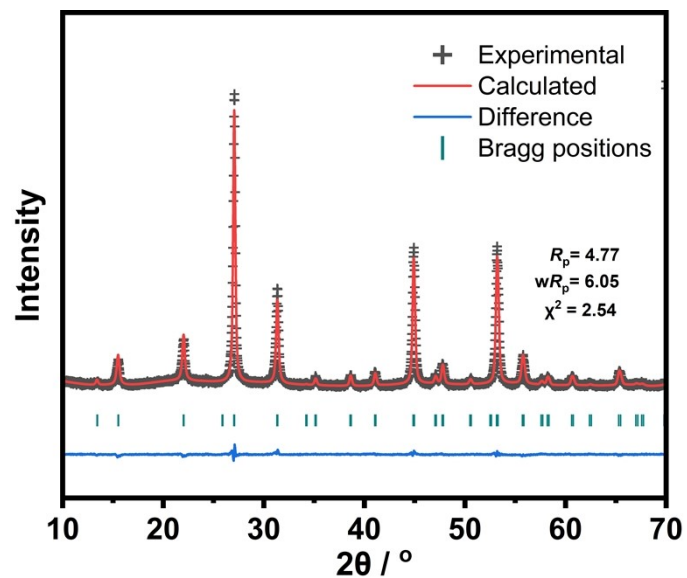

Fig. S6 PXR D of scale-up 1.

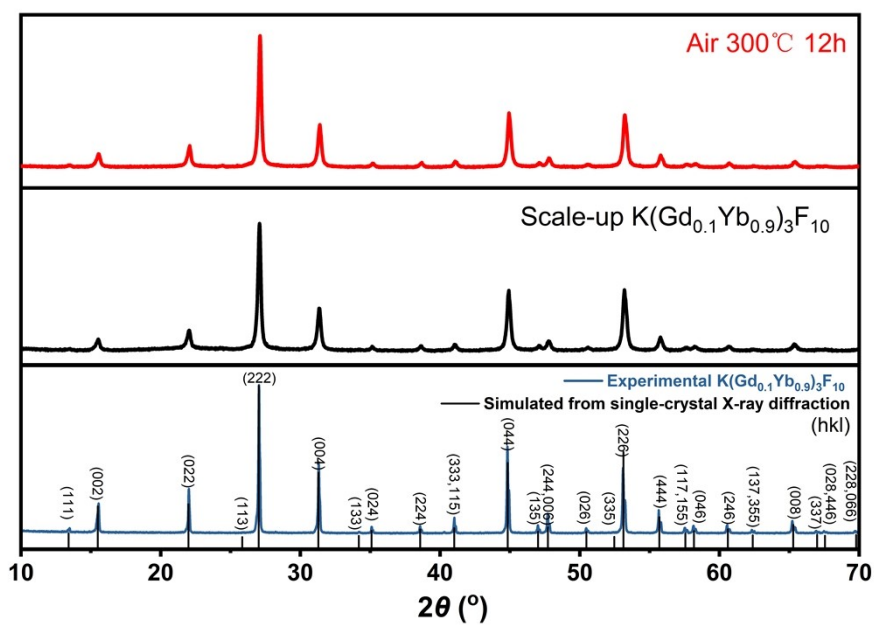

Fig. S7 PXR D of scale-up 1 and 1 under 300 °C after 6 h.

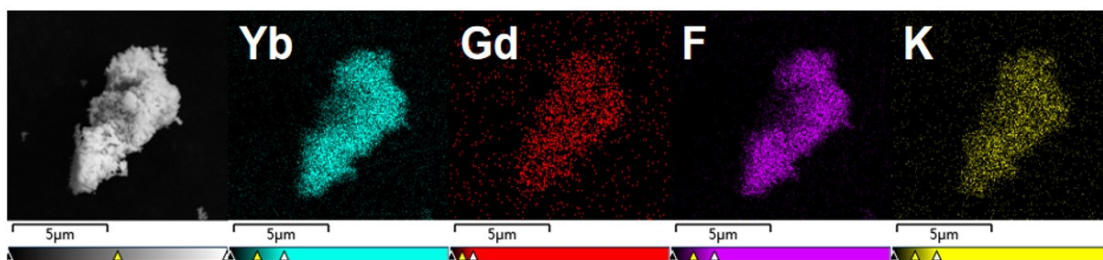

Fig. S8 Elemental mapping of scale-up 1.

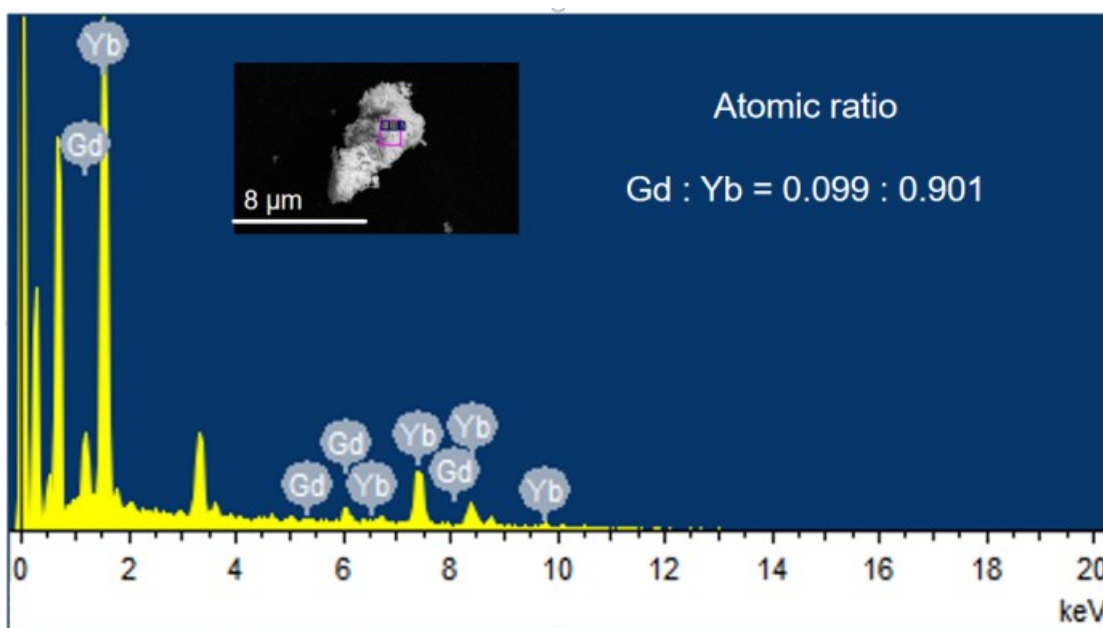

Fig. S9. Energy-dispersive X-ray spectroscopy of scale-up 1.

## References

- 1 Sheldrick GM. *Acta Crystallogr Sect A Found Crystallogr* 2008, 64: 112–122.
- 2 Dolomanov OV, Bourhis LJ and Gildea RJ *et al. J Appl Crystallogr* 2009, 42: 339–341.
